# Supplementary material for: The response of cecal microbiota to inflammatory state induced by Salmonella enterica serovar Enteritidis
Source: Front Microbiol. 2022 Aug 25;13:963678. doi: 10.3389/fmicb.2022.963678 (PMC9453680; doi:10.3389/fmicb.2022.963678)
Supplement: SUPPLEMENTARY TABLE S3 — The 125 metabolic pathways in PICRUSt1 prediction. [file Table_3.XLSX]

## Sheet: Sheet1
Pathway level1	Pathway level2	Pathway level3	Level3 Description	CC6	CC2	CC11	CC10	CC13	CC12	CC9	CC8	CC1	CC5	CC4	RC9	RC8	RC4	RC5	RC6	RC7	RC1	RC2	RC3	CT12	CT13	CT10	CT11	CT8	CT1	CT4	CT5	CT6	CT7	CT3	RT5	RT4	RT7	RT6	RT1	RT3	RT2	RT8	RT11	MC	MT	MT/MC	SD_MC	SD_MT	Pvalue
Metabolism	Metabolism Of Other Amino Acids	ko00472	D-Arginine and D-ornithine metabolism	1515	404	412	75	173	2532	1078	699	298	529	87	147	274	899	294	312	257	387	439	366	2753	970	618	2274	2502	2412	4341	2920	2829	1236	2395	1301	1018	1642	471	593	989	1006	1012	1087	558.85	1718.45	3.07498	584.292	1023.96	8.50546e-05
Metabolism	Biosynthesis Of Other Secondary Metabolites	ko00941	Flavonoid biosynthesis	1191	150	2114	841	1260	3088	2170	892	547	1237	367	120	123	89	28	53	20	92	10	63	3577	368	741	2759	2938	3864	5475	2995	2972	2491	3187	1021	612	769	1465	212	843	1072	1456	1716	722.75	2026.65	2.80408	883.053	1409.97	0.00118798
Metabolism	Biosynthesis Of Other Secondary Metabolites	ko00944	Flavone and flavonol biosynthesis	1816	95	263	207	126	4729	1874	1311	410	1256	78	428	892	869	1122	1279	775	534	1288	239	5385	396	10	4388	4944	4530	8030	5608	4420	2211	4668	310	1236	778	1213	1403	948	511	687	1226	979.55	2645.1	2.70032	1046.82	2344	0.00614674
Metabolism	Lipid Metabolism	ko00140	Steroid hormone biosynthesis	858	355	106	110	124	2373	974	692	239	96	191	297	347	1042	420	316	355	486	466	422	2693	199	25	2190	2449	2239	4016	2806	2211	1108	2341	555	320	777	323	263	457	852	503	225	513.45	1327.6	2.58565	519.001	1166.94	0.00700944
Metabolism	Glycan Biosynthesis and Metabolism	ko00510	N-Glycan biosynthesis	3009	1129	955	175	997	2829	1225	2779	450	2134	522	830	77	188	384	251	201	107	13	106	4044	1374	2887	3791	6487	3742	4699	3447	3182	1836	3653	916	880	615	1203	459	401	867	1111	704	918.05	2314.9	2.52154	991.241	1731.32	0.00334172
Metabolism	Lipid Metabolism	ko00565	Ether lipid metabolism	202	264	184	21	548	151	375	105	101	217	266	8	19	49	26	16	18	22	49	23	67	104	76	90	408	3463	221	108	190	281	196	674	31	25	28	27	29	6	22	17	133.2	303.15	2.2759	145.14	761.682	0.333184
Metabolism	Xenobiotics Biodegradation and Metabolism	ko00791	Atrazine degradation	6218	3424	2395	4826	2971	9313	5356	7620	1335	2306	1170	6730	2870	1552	4755	3763	4039	1196	1110	1934	12437	3009	6561	10447	16541	10248	13796	11469	9307	8477	10992	2576	4154	3775	3503	1778	2913	4284	2407	2480	3744.15	7057.7	1.88499	2353.54	4541.34	0.00621762
Metabolism	Biosynthesis Of Other Secondary Metabolites	ko00943	Isoflavonoid biosynthesis	0	0	0	0	1	1	0	0	0	1	0	0	0	0	0	0	0	0	0	0	0	0	0	0	0	0	5	0	0	0	0	0	0	0	0	0	0	0	0	0	0.15	0.25	1.66667	0.366348	1.11803	0.705977
Metabolism	Glycan Biosynthesis and Metabolism	ko00511	Other glycan degradation	48658	27147	54764	35043	30176	80403	47113	41199	40949	34775	24863	12931	12628	15112	14535	10311	11965	34931	36561	50159	88904	31388	38318	78682	97813	98449	123519	84511	99031	62419	84979	29593	18488	23971	26761	11434	18993	22355	24979	24813	33211.2	54470	1.64011	18001.7	35932.1	0.0232049
Metabolism	Metabolism Of Terpenoids and Polyketides	ko00906	Carotenoid biosynthesis	196	80	1901	226	385	920	1277	71	223	285	275	823	1479	4509	1324	1366	1108	2039	2199	1911	831	73	563	497	342	1482	1238	108	636	1303	750	3564	1611	3181	2145	977	2381	3114	3878	2683	1129.85	1567.85	1.38766	1068.77	1196.36	0.2296
Metabolism	Lipid Metabolism	ko00600	Sphingolipid metabolism	36181	20012	42108	29507	30451	57996	36884	32982	19618	30330	16267	9356	8945	9032	13669	7983	9167	47714	52533	78289	61189	22305	30307	54870	69589	73735	89897	57564	76671	56595	59185	25989	14454	17113	24864	8211	13974	14985	20794	20377	29451.2	40633.4	1.37969	19281.2	25688.9	0.127778
Metabolism	Xenobiotics Biodegradation and Metabolism	ko00361	Chlorocyclohexane and chlorobenzene degradation	4614	4906	2371	1452	3626	4457	2578	3948	1808	3646	2388	4775	3864	4612	3057	3539	3365	2962	3190	1601	5558	3073	4430	4827	8164	4468	5613	5440	4107	4188	5258	2532	3282	3758	2035	3922	3488	3332	3481	3079	3337.95	4201.75	1.25878	1062.95	1369.34	0.0318408
Metabolism	Lipid Metabolism	ko00591	Linoleic acid metabolism	13196	12467	17356	11158	14874	17960	16365	11076	9769	14828	9729	6793	6113	3788	7067	5000	7174	19895	23910	35044	16275	10445	22276	15878	21621	30189	24487	11700	30316	31608	21377	15326	9941	10740	11620	5993	9384	7332	12102	12531	13178.1	16557	1.25641	7420.25	7931.73	0.172241
Metabolism	Metabolism Of Cofactors and Vitamins	ko00830	Retinol metabolism	5475	8432	7382	3415	6513	6908	6235	5973	3244	5557	6586	9472	6815	8740	5830	6243	5552	5560	4746	2668	5991	4400	5367	5799	7112	14439	7752	7164	5352	9446	6682	7888	7245	8424	7424	7209	7541	10320	8559	8286	6067.3	7620	1.25591	1737.42	2145.28	0.0162387
Metabolism	Metabolism Of Other Amino Acids	ko00440	Phosphonate and phosphinate metabolism	12964	9037	15910	9591	11863	20175	16508	11343	20630	10593	9111	9172	7982	8946	11448	8507	7400	14074	14516	18405	19794	9691	8572	18476	19806	19024	25031	17190	17847	17135	19452	12760	14092	14594	12860	9117	13106	12644	12242	14048	12408.8	15374	1.23897	4095.28	4241.46	0.0303726
Metabolism	Xenobiotics Biodegradation and Metabolism	ko00363	Bisphenol degradation	17442	16277	21489	14766	18960	23257	20380	15510	17495	19495	12352	11140	10530	8645	11996	9014	11133	25125	29002	40038	21733	15090	24949	20808	25822	44351	30535	17229	35602	35605	26520	20357	14517	15217	15122	10275	13593	11123	15760	16133	17702.3	21517	1.21549	7645.99	9192.18	0.161789
Metabolism	Carbohydrate Metabolism	ko00040	Pentose and glucuronate interconversions	121513	105543	135582	92156	120421	148892	121971	111206	71591	108265	79853	95921	79199	83848	96139	77534	75548	156358	173620	221011	148826	86155	123333	140793	184596	215731	201896	131582	178223	183560	158394	125181	113891	121826	110022	86683	103974	105804	112512	119417	113809	137620	1.20922	38232.1	37755.8	0.0547681
Metabolism	Biosynthesis Of Other Secondary Metabolites	ko00940	Phenylpropanoid biosynthesis	32125	29134	51776	40810	27926	42458	32600	30563	44464	36277	21135	17903	15520	18119	20655	13907	16074	38471	39976	55288	46402	31842	36888	42253	47862	54289	59452	39980	68912	45037	45758	30608	24070	29688	28017	13259	21400	25520	26261	24493	31259	37099.6	1.18684	12368.4	14113.6	0.172066
Metabolism	Xenobiotics Biodegradation and Metabolism	ko00642	Ethylbenzene degradation	8277	11441	12925	10196	7908	11486	12974	9098	10021	7802	10829	14796	13360	12097	14249	12469	13259	8397	9640	7770	12023	8799	13673	11090	9705	14413	11907	9054	10230	16143	13925	13968	15651	14513	12729	12641	14731	11397	14949	15269	10949.7	12840.5	1.17268	2276.82	2238.31	0.0117119
Metabolism	Carbohydrate Metabolism	ko00053	Ascorbate and aldarate metabolism	33037	36768	28226	20069	29408	35400	28657	26335	23788	31346	30898	36429	25071	33052	29302	26990	22795	35049	37976	38824	32082	23582	30039	34656	40423	45467	41625	32990	30872	35429	34440	35846	39432	45236	32449	31181	33000	44710	33195	35408	30471	35603.1	1.16843	5339.48	5660.16	0.00542068
Metabolism	Carbohydrate Metabolism	ko00562	Inositol phosphate metabolism	25326	30461	23014	16548	24507	34615	26506	22152	15820	24939	29098	24645	17191	17705	17734	15771	16128	29137	31487	38287	32594	19372	28242	31670	39882	40912	44747	33048	38870	38473	34968	18763	19562	21543	18926	17460	18009	22772	18841	18503	24053.5	27857.8	1.15816	6721.06	9436.17	0.150183
Metabolism	Metabolism Of Terpenoids and Polyketides	ko01051	Biosynthesis of ansamycins	23700	30743	36166	25730	23724	31091	27193	23432	20688	25042	15211	19953	16320	13315	17091	13750	16240	32329	35449	47570	26296	23755	41235	25707	33265	50111	37841	23570	38959	42944	36196	27140	20454	22962	22110	14108	18570	19898	21985	23112	24736.8	28510.9	1.15257	8868.7	9638.72	0.20533
Metabolism	Metabolism Of Other Amino Acids	ko00460	Cyanoamino acid metabolism	59358	57331	83900	66900	54009	73491	59969	55600	71398	59846	44260	42793	37502	38803	44724	33143	36825	71747	75461	99611	76426	55324	67938	71906	84224	92033	95296	66595	105606	82168	79740	55476	49159	55956	51468	33698	44916	48230	48569	48723	58333.6	65672.6	1.12581	17584.6	19546.1	0.219547
Metabolism	Lipid Metabolism	ko00561	Glycerolipid metabolism	101344	98857	126346	94107	109552	131494	115053	97116	80259	104810	75621	74358	65504	63671	73236	56713	60901	145626	156775	214102	117384	83042	115735	117052	145846	188084	165935	111269	170781	169588	133958	105333	81827	90681	92315	62757	77660	79762	88076	91731	102272	114441	1.11898	38773.6	36497.2	0.313251
Metabolism	Metabolism Of Cofactors and Vitamins	ko00860	Porphyrin and chlorophyll metabolism	198458	222393	266189	246130	218659	254274	211509	211853	92469	178627	101083	153631	127941	84884	139838	86382	123728	304981	313992	474412	247859	176251	296598	231335	339872	328614	333590	220549	339091	322077	276660	189073	134415	143631	176545	97275	124106	126393	153666	150807	200572	220420	1.09896	95871.3	83908.9	0.490216
Metabolism	Carbohydrate Metabolism	ko00030	Pentose phosphate pathway	206159	219489	281878	197546	221885	240466	210493	205014	188240	212427	159008	167559	142829	142672	150719	124344	131006	276117	291992	377655	222033	186514	248674	215235	273979	319158	289783	205597	303949	307652	254844	215835	187493	212530	192108	148923	178617	184346	196686	208335	207375	227615	1.0976	63495.7	48775.2	0.265357
Metabolism	Metabolism Of Terpenoids and Polyketides	ko01055	Biosynthesis of vancomycin group antibiotics	10671	9114	13249	8191	11025	12304	9700	10288	8898	10204	6953	6216	5996	6840	6229	5774	5105	13741	15660	19020	11938	7669	11624	11447	17158	15662	15391	11099	15018	14740	13026	8305	7257	8171	8210	6436	7229	6868	7796	8651	9758.9	10684.8	1.09487	3661.62	3469.62	0.416868
Metabolism	Xenobiotics Biodegradation and Metabolism	ko00625	Chloroalkane and chloroalkene degradation	46431	48236	59378	42638	57349	57469	52890	46889	38734	47513	35145	36420	29159	26654	31182	25902	28712	68255	74832	103300	53434	38543	58657	50235	72678	83068	70989	46712	81682	87414	62521	45376	34345	38499	39842	27381	34117	34064	40261	40163	47854.4	51999.1	1.08661	19043	18451.9	0.488794
Metabolism	Carbohydrate Metabolism	ko00052	Galactose metabolism	181075	157940	216811	147911	185486	212123	169527	167654	169819	180093	140525	122634	111713	128980	125729	108445	101194	254759	282352	351799	204203	141293	173598	201256	259616	256126	267750	193085	273791	247634	217558	167381	147951	165461	155781	125120	142903	143299	156702	163154	175828	190183	1.08164	63213.6	48032.7	0.423782
Metabolism	Energy Metabolism	ko00680	Methane metabolism	292488	309652	401736	316289	322642	355351	322224	296174	255244	303987	202227	233469	200063	173672	217847	160118	189030	405035	424325	595161	331381	260573	381983	322396	433861	443651	429077	289939	478822	480404	375639	289537	240381	261428	269255	178249	225544	226395	259758	263947	298837	322111	1.07788	104884	91865.4	0.459945
Metabolism	Biosynthesis Of Other Secondary Metabolites	ko00521	Streptomycin biosynthesis	62449	57673	77061	49687	67883	76298	62463	59908	53433	62231	44553	39059	33118	32168	34671	30016	30198	86770	96116	127686	71237	47245	71963	68299	98395	96285	96271	65415	97592	98082	81176	47507	39256	44436	45503	32900	40306	39006	45146	48555	59172.1	63728.8	1.07701	25113	23646.3	0.558165
Metabolism	Metabolism Of Terpenoids and Polyketides	ko00523	Polyketide sugar unit biosynthesis	38985	32603	48639	31332	40069	42781	35079	36703	33744	35169	25613	20270	18612	18982	19506	17106	16274	50706	56861	74076	40968	28820	45098	40478	62432	56063	53176	36849	55459	52775	46518	27424	22786	25897	26961	19026	23304	21035	26301	28863	34655.5	37011.7	1.06799	15047.6	13719.7	0.607838
Metabolism	Xenobiotics Biodegradation and Metabolism	ko00983	Drug metabolism - other enzymes	65128	70189	90882	72577	74996	90026	73956	67827	57549	64088	46772	53013	47279	41359	53843	39917	44746	101653	108727	149939	83097	60638	81339	78441	96523	102994	114145	78367	115749	111274	92363	63026	55186	58732	60004	42998	52371	49928	54665	58313	70723.3	75507.6	1.06765	27099	23248.4	0.552561
Metabolism	Carbohydrate Metabolism	ko00051	Fructose and mannose metabolism	254104	231654	293371	197059	292251	274907	250472	228152	242129	275164	233556	170196	150587	167846	176885	149639	139177	395824	446813	582103	242366	205241	260485	253819	321583	331524	325136	221012	369814	369657	272572	291044	260946	299294	243067	202680	239594	226165	256449	282560	257594	273750	1.06272	109719	49546.9	0.551962
Metabolism	Metabolism Of Terpenoids and Polyketides	ko00903	Limonene and pinene degradation	24769	32171	24429	23576	25485	27407	25566	26462	29819	24705	23420	39503	31857	31834	32977	28241	28801	24243	20960	17070	26799	25350	23584	26360	27387	36635	25100	27887	23192	28412	27501	28362	34386	33827	27563	31273	31660	33171	28848	29204	27164.8	28825	1.06112	4956.78	3641.95	0.234832
Metabolism	Energy Metabolism	ko00710	Carbon fixation in photosynthetic organisms	132495	150160	188133	140101	147625	158439	141651	135195	124077	142693	97558	115558	99898	96463	106719	85139	90828	193499	203492	267474	139629	123197	171706	139195	175818	209805	184100	130719	193772	204147	165313	144453	126092	139359	134007	98795	117556	121817	131861	137981	140860	149466	1.0611	45147.1	30934.6	0.486181
Metabolism	Amino Acid Metabolism	ko00330	Arginine and proline metabolism	263954	271040	366912	296285	295084	324985	286013	270475	229481	259192	185236	222599	190880	168720	218598	157652	179866	395540	412351	573966	311457	227369	323780	297249	391336	433846	396630	274887	398833	413487	341338	269564	230950	248491	249452	172067	218974	215723	235701	246031	278441	294858	1.05896	100556	77465.2	0.566411
Metabolism	Xenobiotics Biodegradation and Metabolism	ko00626	Naphthalene degradation	30962	33565	43954	30510	37187	40224	39659	31841	35032	31301	29606	33186	30319	30800	33717	28909	28367	47436	52523	63390	36346	28417	35578	34959	39505	60287	46168	32089	48569	57180	40786	38272	35312	35569	34741	29355	34178	30506	36418	37533	36624.4	38588.4	1.05363	9077.88	8469.09	0.483591
Metabolism	Carbohydrate Metabolism	ko00660	C5-Branched dibasic acid metabolism	77364	81130	99580	75471	87291	89252	76728	82925	61260	79269	47304	65135	50501	46700	53156	39354	46022	107871	107235	151203	86375	68276	89207	81545	116227	101404	107315	80068	119262	119453	95558	63593	55381	62292	64391	44934	54128	61804	61832	60096	76237.6	79657.1	1.04485	27167.5	23517.6	0.672809
Metabolism	Lipid Metabolism	ko00121	Secondary bile acid biosynthesis	7604	6149	11848	6578	5920	6669	6186	6781	8307	7369	8101	3375	3284	4095	2196	2184	2584	4553	3884	4242	6279	5743	7543	7422	8867	7680	6897	6218	5714	5635	7008	5251	3481	4887	5204	3239	4018	5138	5400	5282	5595.45	5845.3	1.04465	2458.32	1435.31	0.696869
Metabolism	Carbohydrate Metabolism	ko00520	Amino sugar and nucleotide sugar metabolism	339614	326520	412191	297897	365272	396233	333683	317291	390600	337688	294108	248647	210765	226560	235909	194893	197241	478296	515245	671450	370118	297598	347500	360897	445316	422803	466926	347301	492822	460954	406158	321927	297743	344050	292064	238136	282851	296181	288684	309451	339505	354474	1.04409	118338	72197.2	0.631928
Metabolism	Lipid Metabolism	ko00120	Primary bile acid biosynthesis	7609	6182	11902	6593	5941	6690	6194	6791	8324	7376	8112	3375	3284	4144	2196	2184	2584	4553	3885	4260	6280	5769	7575	7426	8873	7716	6929	6228	5727	5637	7018	5252	3481	4911	5207	3240	4025	5141	5400	5282	5608.95	5855.85	1.04402	2467.2	1440.72	0.701303
Metabolism	Nucleotide Metabolism	ko00240	Pyrimidine metabolism	367067	389248	520297	399409	407000	439615	392926	374889	357363	372983	295969	312179	278641	262884	301031	237192	257289	522828	551908	726542	410096	334070	447469	400689	496828	552608	520623	374473	555565	561549	461997	372479	325946	350280	355187	263054	315087	308725	339411	355751	388363	405094	1.04308	119502	91432.5	0.621856
Metabolism	Xenobiotics Biodegradation and Metabolism	ko00980	Metabolism of xenobiotics by cytochrome P450	10169	17119	9763	6079	13199	9972	8346	11319	6465	9802	11701	19727	13100	16016	10848	10997	10128	10771	7061	3537	7876	9537	7077	8127	10847	16232	8470	12284	6810	11987	8638	10479	12271	14205	10778	13757	12709	19377	12103	11635	10806	11260	1.04201	3814.35	3147.87	0.683714
Metabolism	Metabolism Of Other Amino Acids	ko00473	D-Alanine metabolism	25875	27306	31777	27058	27981	29750	26609	25974	21596	24214	22438	24773	21900	20185	22555	17721	19891	33730	33458	43793	28044	23126	26666	28309	32087	33037	34639	27999	34697	34862	29231	26512	24316	26075	23106	20697	24166	22090	24340	25266	26429.2	27463.2	1.03913	6017.46	4393.47	0.538521
Metabolism	Carbohydrate Metabolism	ko00500	Starch and sucrose metabolism	225611	211340	319492	226848	251431	273542	231626	222510	207092	235958	153825	162090	135634	137091	163269	124064	127753	354823	382246	520006	264151	189700	249689	248239	331874	336740	349828	233615	365926	354192	282217	204685	175323	195178	197273	131668	166834	177721	187736	195053	233313	241882	1.03673	99494.9	72100.3	0.75682
Metabolism	Xenobiotics Biodegradation and Metabolism	ko00982	Drug metabolism - cytochrome P450	10239	17317	10037	6126	13314	10004	8366	11350	6519	9823	11928	19163	13097	15930	10572	10808	10089	10756	7082	3580	7779	9750	7575	8119	10772	16230	8547	12299	6902	11897	8609	10382	11863	13922	10578	13724	12629	18866	12009	11578	10805	11201.5	1.0367	3748.63	3015.08	0.714476
Metabolism	Amino Acid Metabolism	ko00280	Valine, leucine and isoleucine degradation	48012	67609	48258	52955	46945	54239	50722	50332	35922	45077	52498	72136	57421	54046	58998	47556	52260	55099	49697	54440	48253	48330	56314	51785	56547	58734	53382	53794	54317	58321	52031	52374	60008	60675	51055	53282	55585	59485	51177	52145	52711.1	54379.7	1.03166	7727.9	3706.45	0.389408
Metabolism	Amino Acid Metabolism	ko00290	Valine, leucine and isoleucine biosynthesis	170376	176820	238566	183748	191935	201556	182173	180358	145032	176790	117283	139767	118977	109609	128597	95315	108696	247312	253063	351350	190019	151843	203512	183436	247459	224056	240415	172741	264958	265461	207611	155655	135272	148570	155745	106248	131820	136231	149218	150730	175866	181050	1.02948	62158	47330.8	0.768286
Metabolism	Xenobiotics Biodegradation and Metabolism	ko00627	Aminobenzoate degradation	31192	33079	30992	28552	30998	35922	33484	28783	23857	27078	31997	38158	34403	35500	38828	33638	31965	39967	45344	47713	33782	26140	31400	34972	38314	37433	40276	32840	35372	40466	35516	30714	39841	38731	33009	35120	35670	31954	33149	35928	34072.5	35031.3	1.02814	5812.75	3600.64	0.53432
Metabolism	Glycan Biosynthesis and Metabolism	ko00550	Peptidoglycan biosynthesis	172035	181134	248314	192169	195042	201177	182352	177922	165976	172366	139540	153539	138501	129384	150313	120497	126851	249692	266764	345104	189256	152359	212101	186438	238952	250176	232623	169692	239785	259685	211446	177720	163873	172816	172658	132236	156255	146745	167061	178624	185434	190525	1.02746	55602.5	37265.4	0.735599
Metabolism	Carbohydrate Metabolism	ko00650	Butanoate metabolism	154565	188908	179357	175574	169171	182890	175292	159928	117333	152786	128729	194593	165071	146800	180656	138445	151350	217113	216281	275709	161213	147249	186243	167626	198127	203482	198482	160515	210804	233366	180064	170589	182111	180750	167472	149970	166960	163386	161051	170586	173528	178002	1.02579	35314.8	21742.5	0.632189
Metabolism	Metabolism Of Other Amino Acids	ko00430	Taurine and hypotaurine metabolism	21372	24796	26122	24032	24270	24942	21977	22557	19995	21159	16950	23811	20216	20550	22566	18383	18426	32600	34252	42201	23311	19945	23551	22639	28270	31160	28004	22810	30276	30187	25335	23698	24486	26038	22848	20360	21978	23024	21743	23273	24058.8	24646.8	1.02444	6044.56	3298.5	0.704702
Metabolism	Metabolism Of Cofactors and Vitamins	ko00785	Lipoic acid metabolism	8253	10253	6178	5074	7739	7343	7673	6931	4191	5795	10170	11717	9066	11196	8333	7685	7365	7004	5282	3397	6625	6934	4458	7273	7553	9739	7209	8576	5727	6333	6035	7530	8562	9678	7034	9107	8565	11404	7884	7773	7532.25	7699.95	1.02226	2222.16	1585.65	0.785013
Metabolism	Nucleotide Metabolism	ko00230	Purine metabolism	477765	515289	620740	482913	522946	535523	482868	478604	435889	462827	404411	428864	367061	361049	381894	310171	331553	653907	678036	873699	497197	426426	549128	494179	636305	660193	615027	471192	669494	677749	555532	449395	409118	446704	435822	349364	397797	417337	420944	436922	490300	500791	1.0214	135009	101966	0.78305
Metabolism	Amino Acid Metabolism	ko00260	Glycine, serine and threonine metabolism	184776	210205	235964	199629	208564	217672	194621	186834	162431	181893	136559	177387	149453	138078	162114	122297	134342	271191	274985	370519	194883	172718	219503	194220	250927	249013	249829	187551	272399	272310	214842	177688	170136	181368	177116	137958	160504	168054	165388	173329	195976	199487	1.01792	58987	39804.1	0.826541
Metabolism	Xenobiotics Biodegradation and Metabolism	ko00362	Benzoate degradation	51887	62038	78662	68132	58033	65604	62756	53619	54965	51482	42942	59217	52491	46422	62478	47292	50290	79036	83605	107504	62020	50962	65361	59340	62407	78186	75080	52568	71883	81149	66263	62738	64211	63720	61545	48399	58023	51962	59416	62496	61922.8	62886.4	1.01556	15496	8724.78	0.809812
Metabolism	Metabolism Of Other Amino Acids	ko00450	Selenocompound metabolism	86105	95887	113653	93290	92282	98032	90517	83701	89162	85272	74779	78132	63994	62753	69357	54451	59643	116760	120713	159610	90502	80265	105308	90334	112095	112394	110151	84117	120206	118005	100010	82130	76876	84792	81971	60891	70600	79530	77017	77736	89404.6	90746.5	1.01501	24765.6	17050.4	0.842871
Metabolism	Metabolism Of Cofactors and Vitamins	ko00670	One carbon pool by folate	114799	124313	172166	138071	131412	141350	130906	121672	127354	122175	87750	99684	90371	79950	103003	77225	83897	175411	184187	247783	129908	111050	141598	126338	152999	180413	162836	117623	181436	179600	146078	121095	108593	112024	117533	83982	100693	94801	107747	113550	127674	129495	1.01426	42026.2	29168.8	0.874368
Metabolism	Energy Metabolism	ko00195	Photosynthesis	77496	70488	111866	74246	76175	68220	53100	72938	69183	80420	54622	39371	36448	40192	37463	28943	30865	94827	99684	128285	74323	62993	89141	74867	111585	96941	80591	64045	87306	75071	75957	60378	47136	54486	59540	40866	44618	46714	55821	53974	67241.6	67817.6	1.00857	27605.5	18896.7	0.939022
Metabolism	Amino Acid Metabolism	ko00360	Phenylalanine metabolism	39997	53726	54975	46570	45626	46346	43342	42953	34649	40013	32222	44770	35982	31903	36436	28077	31726	52756	48714	64922	38878	39599	47250	39877	49239	48701	50368	41328	57028	59163	44257	38735	38632	42837	37829	32439	37708	40624	37248	39339	42785.2	43053.9	1.00628	9372.81	6883.01	0.918239
Metabolism	Amino Acid Metabolism	ko00400	Phenylalanine, tyrosine and tryptophan biosynthesis	174583	193150	268951	210438	206558	210922	190403	189182	165272	192007	116917	137359	115308	100301	124531	86203	104115	275465	277786	403371	189857	164575	227129	183758	250036	238332	249051	172323	280116	279298	216243	166001	135185	154152	168048	99472	130586	143074	155383	157895	187141	188026	1.00473	77042.2	51305.9	0.966133
Metabolism	Carbohydrate Metabolism	ko00620	Pyruvate metabolism	247900	269224	332287	267197	282515	288621	273835	249151	228734	254124	206216	228974	201145	191157	221584	171952	183696	364166	381803	507738	252808	218992	295065	262043	327023	347901	324696	235431	352027	381441	288106	250518	232952	247531	248620	186345	220141	222015	233767	244827	267601	268612	1.00378	79858.5	52805.4	0.962562
Metabolism	Carbohydrate Metabolism	ko00630	Glyoxylate and dicarboxylate metabolism	133326	156433	156402	125067	163456	155443	130211	137339	99623	133870	96146	130875	105507	100578	103237	81308	90710	205737	203655	273578	138493	117594	145901	132899	183184	177459	178925	141767	176575	191618	152642	122512	112942	128019	116031	103305	112202	124472	116523	119338	139125	139620	1.00356	46759.9	27748.3	0.967738
Metabolism	Metabolism Of Terpenoids and Polyketides	ko00908	Zeatin biosynthesis	8413	8859	13297	9927	9955	10167	9456	8802	8672	9303	6534	6698	6172	5551	6925	5257	5767	13389	14426	19626	9295	7741	10904	9059	11379	12804	11911	7986	13298	14152	10625	8790	7466	7936	8520	5698	7095	6678	7968	8406	9359.8	9385.55	1.00275	3565.02	2347.65	0.978619
Metabolism	Xenobiotics Biodegradation and Metabolism	ko00622	Xylene degradation	16542	16728	29084	18078	19992	19111	17774	16522	16745	15572	13414	11537	10316	10857	11673	9144	8905	24499	25699	34598	17551	14781	17256	16611	21509	26059	23469	15398	25760	26639	18163	15372	12727	14803	15235	10072	12588	13578	14396	15632	17339.5	17380	1.00233	6820.4	4796.08	0.982804
Metabolism	Carbohydrate Metabolism	ko00010	Glycolysis / Gluconeogenesis	262784	283482	366467	267128	300417	310459	290057	252832	323917	280615	235767	224722	194578	203253	217545	175443	179016	387333	411219	534655	269647	242670	303744	276833	328400	377157	343700	249220	382260	395674	310571	272140	246809	272738	256996	193271	233995	246357	250084	259134	285084	285570	1.0017	88366.6	54704.6	0.98344
Metabolism	Metabolism Of Other Amino Acids	ko00471	D-Glutamine and D-glutamate metabolism	27129	30254	40757	32821	31745	32142	30872	28273	27279	28895	21763	25053	22085	19987	24784	18425	20817	42651	44543	60423	30753	25718	34235	29251	35938	39072	37262	26092	41365	43028	33905	29460	25850	27377	28245	20130	24759	24001	26831	27602	30534.9	30543.7	1.00029	10115.4	6221.09	0.997373
Metabolism	Biosynthesis Of Other Secondary Metabolites	ko00965	Betalain biosynthesis	0	0	0	0	0	0	0	0	0	0	1	0	0	0	0	0	0	0	0	0	0	0	0	0	0	0	0	0	0	0	0	0	0	0	0	0	1	0	0	0	0.05	0.05	1	0.223607	0.223607	1
Metabolism	Biosynthesis Of Other Secondary Metabolites	ko00901	Indole alkaloid biosynthesis	0	0	0	0	0	0	0	0	0	0	1	0	0	0	0	0	0	0	0	0	0	0	0	0	0	0	0	0	0	0	0	0	0	0	0	0	1	0	0	0	0.05	0.05	1	0.223607	0.223607	1
Metabolism	Glycan Biosynthesis and Metabolism	ko00601	Glycosphingolipid biosynthesis - lacto and neolacto series	0	0	0	0	0	0	0	0	0	0	0	0	0	1	0	0	0	0	0	0	0	0	0	0	0	0	0	0	0	0	0	0	0	0	0	0	1	0	0	0	0.05	0.05	1	0.223607	0.223607	1
Metabolism	Amino Acid Metabolism	ko00250	Alanine, aspartate and glutamate metabolism	218353	231590	315623	243841	257987	257993	227877	223753	211007	228518	159371	174997	155505	142730	166345	124656	138818	335606	345208	473959	234751	199554	250866	228872	294680	305869	304172	218910	332587	328124	259433	207021	176741	194660	199532	144572	174284	173932	188489	197203	231687	230713	0.995795	85274.1	56122.6	0.96618
Metabolism	Amino Acid Metabolism	ko00340	Histidine metabolism	119185	135316	196202	153226	142927	149401	136956	131322	152274	136000	77617	106205	96161	80384	108260	78799	89075	188751	194619	268384	137533	121132	161296	131363	164523	156726	165473	118859	186369	195704	152563	128630	116250	120759	126452	85646	108241	100092	118975	123740	137053	136016	0.992434	47937.3	28534.2	0.93419
Metabolism	Amino Acid Metabolism	ko00300	Lysine biosynthesis	186567	197134	279887	216745	223798	225007	204497	193114	190334	195732	130122	143669	126651	107918	140499	101427	117682	300340	316060	446758	205806	172922	240125	197432	266653	277502	262783	178957	292332	302847	233310	179408	147997	161569	171613	111670	142703	139113	159629	166329	202197	200535	0.99178	84137	56377.9	0.941881
Metabolism	Xenobiotics Biodegradation and Metabolism	ko00621	Dioxin degradation	17380	17840	29326	18548	20317	19287	18308	16685	17046	15823	15774	13175	11599	13104	13623	11155	10156	25609	27605	35414	17679	14822	17402	17390	21827	26142	23506	15478	25776	26768	18268	16389	14857	17046	16696	11823	14176	15582	15724	17164	18388.7	18225.8	0.991139	6547.74	4258.32	0.926155
Metabolism	Metabolism Of Cofactors and Vitamins	ko00760	Nicotinate and nicotinamide metabolism	91471	113063	128501	95368	108352	99447	90604	99016	89531	97657	74733	92835	75219	70782	72728	59487	64724	130706	127739	165865	85530	89225	109642	86334	115828	125780	104573	87040	124408	136229	102624	88907	80732	90079	86740	71785	80034	89970	83596	88176	97391.4	96361.6	0.989426	26210.7	17520.6	0.884633
Metabolism	Energy Metabolism	ko00720	Carbon fixation pathways in prokaryotes	188671	232987	263433	236401	222976	217184	211532	208429	163356	201153	147170	216183	185595	158962	200261	149861	169035	277414	275978	372119	187493	183477	250030	194947	252241	252194	227221	179643	257784	300749	218687	205672	201638	205726	206266	161933	187309	187974	189799	201896	214935	212634	0.989294	53451.1	34168.5	0.871998
Metabolism	Amino Acid Metabolism	ko00270	Cysteine and methionine metabolism	197293	223989	272586	226396	236545	239215	224976	202666	199168	213646	155576	186463	155265	140857	178964	132571	145317	322775	336670	464088	209877	185404	251031	209146	262268	272666	271219	193345	292946	313695	242856	208049	189800	200949	207357	144742	177072	185159	187216	195341	222751	220007	0.98768	79145.8	44055.9	0.892936
Metabolism	Metabolism Of Terpenoids and Polyketides	ko00900	Terpenoid backbone biosynthesis	104724	115248	161285	127988	120716	120670	115268	107133	106285	115501	86504	89371	83636	76494	94386	72290	78361	170463	184828	246692	108303	98899	140417	109196	134394	149663	137059	93008	163135	168908	127126	114737	100940	106137	111535	77944	95005	88024	104021	110333	118892	116939	0.983574	43004.5	24876.4	0.861386
Metabolism	Carbohydrate Metabolism	ko00640	Propanoate metabolism	127373	150397	155191	133548	153363	145290	133466	132972	119805	137986	103983	138443	115904	107814	123576	97982	103229	187561	188926	245300	125192	118239	140014	128210	161747	156976	153297	125832	169093	186820	142574	126581	130023	135070	128387	112055	122388	125310	121034	128135	140105	136849	0.976756	35017.1	19280.7	0.717629
Metabolism	Metabolism Of Cofactors and Vitamins	ko00770	Pantothenate and CoA biosynthesis	132882	142075	186431	150044	159280	148224	133145	141240	104676	144108	95556	111583	92655	84098	100776	73339	84412	210134	215551	302171	137723	120323	160592	134094	183998	173037	175151	127723	195163	199974	151853	122948	104426	114895	123196	84725	100405	107454	113983	114431	140619	137305	0.976431	55347.9	33546.4	0.820085
Metabolism	Lipid Metabolism	ko00072	Synthesis and degradation of ketone bodies	6592	9937	9351	12743	7853	10147	10307	7622	3129	6063	6007	13442	12167	10630	16013	12285	12223	18164	21649	26162	9200	7622	12272	9215	8934	7360	11757	7491	13375	14641	10357	11972	15808	13848	12901	11722	12604	9792	12086	13442	11624.3	11320	0.973818	5537.68	2455.99	0.82343
Metabolism	Metabolism Of Cofactors and Vitamins	ko00730	Thiamine metabolism	104816	115693	153515	126543	121345	121418	110293	108660	106731	114096	83410	83921	72494	62748	78765	58107	66534	162993	170106	237619	105921	97019	137992	108204	141069	152499	136459	99068	152010	156394	125742	101573	84451	92999	99571	64786	79330	82490	88364	92706	112990	109932	0.972936	43303.1	27490.1	0.791199
Metabolism	Lipid Metabolism	ko00061	Fatty acid biosynthesis	108415	116621	162276	127682	128725	120575	119338	115857	107869	116823	93565	102310	90532	84812	101611	79677	83033	166181	174968	230445	108153	102195	126476	108164	134825	143673	131955	97443	157138	168247	121446	113960	107008	111534	113735	86264	101834	97869	107880	114407	121566	117710	0.968285	36988.9	20682.9	0.686396
Metabolism	Energy Metabolism	ko00190	Oxidative phosphorylation	243143	268816	315828	244549	294906	257172	228750	244924	208767	255238	187380	207163	167148	171230	172998	132217	149778	361060	367686	504289	241602	218995	278575	235608	331994	301055	293139	223687	350347	352370	266057	206838	178281	204097	206410	155805	174393	203925	194108	184958	249152	240112	0.963717	88419.4	59767.2	0.706942
Metabolism	Carbohydrate Metabolism	ko00020	Citrate cycle (TCA cycle)	111946	145328	137904	126513	127136	120181	129193	115012	77907	111744	106788	144982	120402	115361	126004	100102	108562	155891	154348	196878	95194	103272	141564	107831	132684	136174	118701	97157	129199	171230	117455	119671	124870	131054	123635	104385	115855	129815	117513	122478	126609	121987	0.963492	25086.6	17198.2	0.50086
Metabolism	Amino Acid Metabolism	ko00380	Tryptophan metabolism	44216	60967	37403	37021	49944	43178	35158	44644	33361	40385	41173	63334	46923	50162	45455	38622	39058	53483	45521	48840	37487	41722	37014	39819	50939	44640	40792	47651	42632	44928	39002	36579	46201	50349	38926	46880	44041	56885	37489	38312	44942.4	43114.4	0.959326	7956.09	5492.28	0.403066
Metabolism	Biosynthesis Of Other Secondary Metabolites	ko00950	Isoquinoline alkaloid biosynthesis	8789	11478	9026	10603	10162	9295	8623	9164	3603	8771	5912	10065	7933	6843	9405	5615	6998	14708	13315	19937	7804	8315	9407	8529	11884	10914	10601	8515	12318	10898	8743	9031	8661	9006	8836	6948	8110	9303	7147	7452	9512.25	9121.1	0.958879	3533.33	1495.92	0.651055
Metabolism	Biosynthesis Of Other Secondary Metabolites	ko00401	Novobiocin biosynthesis	27842	33769	36710	32253	34002	31547	28415	30750	22674	29828	19731	27388	22624	19922	23187	16180	19771	43572	41082	59087	27323	27013	31809	27279	36771	34177	34724	28172	39860	40429	30933	26748	22909	25492	25729	19543	23294	25122	23879	24031	30016.7	28761.8	0.958195	10019.7	5815.32	0.630877
Metabolism	Metabolism Of Terpenoids and Polyketides	ko00253	Tetracycline biosynthesis	38399	38492	61043	44597	46088	37048	39624	40984	41595	43625	32198	33030	30277	28979	33349	26087	27157	53061	54765	71643	34909	34964	43322	35740	47184	45803	36976	28615	48493	54072	37872	40948	37305	39218	40574	30091	36206	33345	39526	41408	41102.1	39328.6	0.956851	11754.4	6233.85	0.554635
Metabolism	Energy Metabolism	ko00920	Sulfur metabolism	58985	71030	77533	65008	66761	61839	53183	60532	53023	63711	48440	60504	48820	49542	49054	39769	42672	88150	87971	113827	52490	55971	73915	55949	72932	71711	64016	56392	69174	76195	61564	55262	53488	60958	57079	46304	50255	60245	52992	54155	63017.7	60052.3	0.952944	17919.6	8599.94	0.508678
Metabolism	Energy Metabolism	ko00910	Nitrogen metabolism	166115	198855	195250	172957	196308	178000	154129	176076	149376	163632	134931	170229	135612	128719	131604	107683	118988	230247	221714	292673	153819	156729	181836	156310	207358	196940	189241	169814	206743	213858	177438	139752	133339	152036	138386	124584	134397	153259	131892	134550	171155	162614	0.950099	43774.1	28465.5	0.468959
Metabolism	Amino Acid Metabolism	ko00350	Tyrosine metabolism	83593	103376	109429	84412	100545	89069	83997	86076	81482	83407	75146	93013	79227	76735	79011	66027	68369	120803	119168	146034	76529	79320	88745	79400	98631	102198	90584	79542	99842	114821	86015	83098	82613	87152	79737	76682	82824	82675	82039	85015	91445.9	86873.1	0.949994	19855.9	9899.85	0.362486
Metabolism	Biosynthesis Of Other Secondary Metabolites	ko00960	Tropane, piperidine and pyridine alkaloid biosynthesis	22133	31169	30796	26403	28184	25675	23964	25687	21630	25096	16346	26654	21369	18146	21721	15324	18616	35420	31631	44466	22023	23634	26807	21522	28222	28979	25942	22990	29974	32997	25828	23358	21142	22526	21609	18527	21771	23051	20706	20961	25521.5	24128.5	0.945417	6936.92	3681.35	0.432533
Metabolism	Metabolism Of Other Amino Acids	ko00480	Glutathione metabolism	50351	67030	47593	42714	56622	45170	37753	51776	36230	44553	49641	72258	53346	61320	50543	43769	43092	62137	50924	52400	40695	45998	35014	43061	54357	47811	41469	53243	42693	44932	41099	44210	52923	59940	45762	54882	52250	70213	45858	46299	50961.1	48135.4	0.944553	9307.05	7941.63	0.308204
Metabolism	Metabolism Of Cofactors and Vitamins	ko00750	Vitamin B6 metabolism	41580	48221	54793	42673	53072	49775	45150	44825	33955	45530	32757	43469	35823	34435	37848	29603	31242	69848	70292	94471	42423	37715	44884	41888	51934	50804	55854	43592	53837	64977	47220	37842	38156	40558	42096	33893	37186	40987	39159	40153	46968.1	44257.9	0.942297	15871.6	7699.75	0.496211
Metabolism	Xenobiotics Biodegradation and Metabolism	ko00624	Polycyclic aromatic hydrocarbon degradation	20017	17601	36921	25250	21114	21846	20701	18849	28833	20772	16729	11323	13093	13252	15826	12336	12441	29933	34173	43582	22044	17180	24732	21710	25461	24594	24240	15652	23111	25393	22899	20820	18166	19396	20026	13011	17000	13407	19715	20693	21729.6	20462.5	0.941688	8923.86	3800.43	0.562521
Metabolism	Lipid Metabolism	ko00564	Glycerophospholipid metabolism	129614	146833	184025	147246	157730	142142	130775	135336	125297	134066	109735	119114	100781	97584	106290	80740	88641	207318	209402	281952	126673	122276	150704	127458	163714	169985	157185	123290	168291	176445	142425	124273	111264	123336	124770	95348	107647	118610	116447	118679	141731	133441	0.941509	48251.8	23128.7	0.492608
Metabolism	Amino Acid Metabolism	ko00310	Lysine degradation	36230	52816	39522	38736	44048	38008	33803	38507	35768	35947	28993	57912	42712	42016	44341	34230	36508	51489	42485	51032	33767	40019	34685	33237	40320	37039	33703	38683	34960	39942	35684	36315	44887	46642	37705	41052	41854	51511	36411	37233	41255.2	38782.4	0.940063	7333.15	4712.29	0.21229
Metabolism	Global and Overview Maps	ko01212	Fatty acid metabolism	66898	88030	69352	63031	85171	69861	61199	70158	48173	66208	55017	87189	67849	67368	66361	53843	56132	101799	92906	116779	58421	64215	60217	59806	79474	73955	69934	69881	77172	84498	62473	61692	66552	70981	61958	66337	66222	75975	61816	63340	72666.2	67745.9	0.93229	17414.8	7292.84	0.251098
Metabolism	Metabolism Of Cofactors and Vitamins	ko00740	Riboflavin metabolism	44051	56446	51038	49176	50572	38014	35901	49876	30482	41944	34384	52432	41502	42253	40284	31839	34684	63318	57146	73141	33441	42787	49707	36461	53629	37899	34597	39140	44197	46311	36572	43085	42288	48490	42933	38936	41974	49081	41496	42069	45924.2	42254.7	0.920097	11097.3	5304.45	0.190078
Metabolism	Metabolism Of Cofactors and Vitamins	ko00790	Folate biosynthesis	78613	89730	92153	76270	103953	85101	73619	84557	53187	89704	63881	72661	57585	57971	57920	45689	47351	131632	132931	179382	71039	68974	78023	71314	108661	88402	96567	78426	111560	111225	78122	63215	58507	66002	70173	58033	58437	71972	60469	62891	83694.5	76600.6	0.915241	33115.5	17645.6	0.40314
Metabolism	Lipid Metabolism	ko01040	Biosynthesis of unsaturated fatty acids	39896	52670	40156	35250	49194	38706	34814	43102	29851	38152	34033	52589	38425	38865	36706	30300	31631	54585	47135	58726	32404	39559	33793	33110	45216	39064	37231	40548	44855	47977	35606	30920	35797	39297	33505	36813	36097	46598	32297	32904	41239.3	37679.6	0.913681	8487.39	5130.76	0.116733
Metabolism	Metabolism Of Other Amino Acids	ko00410	beta-Alanine metabolism	45699	60030	54961	52235	57224	43703	38435	51366	37286	49622	34025	56931	42378	40272	42563	33323	35671	67532	60895	79212	38651	45546	47548	39582	58467	50172	41261	44982	51747	52762	40262	40658	42661	46128	44147	40635	39815	50157	39653	39589	49168.2	44721.2	0.909555	12135.7	5534.27	0.144206
Metabolism	Lipid Metabolism	ko00590	Arachidonic acid metabolism	4459	7160	2934	4584	5088	2981	3267	4833	2609	3341	4785	10182	7125	7470	7779	6575	6301	5303	3900	2621	2783	4473	2917	3386	3405	2107	1557	4207	2128	3242	2746	5472	7712	7558	5311	7350	7163	8695	5484	5733	5164.85	4671.45	0.90447	2062.37	2159.89	0.464525
Metabolism	Glycan Biosynthesis and Metabolism	ko00540	Lipopolysaccharide biosynthesis	42337	69212	25399	20627	53126	35106	23175	45992	26531	35976	40306	75495	50224	61463	36468	36310	35645	40735	18824	6841	26749	43673	18893	27883	39396	27180	25196	52618	23398	30369	27004	21326	37164	48190	29274	51242	40955	72270	29833	29275	38989.6	35094.4	0.900096	17104.1	13191.7	0.424993
Metabolism	Glycan Biosynthesis and Metabolism	ko00531	Glycosaminoglycan degradation	10466	8353	13754	8292	12320	16806	11333	7876	37624	12005	8464	3477	3426	4941	4867	3929	3128	12076	12107	15190	15155	11507	4236	13883	11764	10963	17945	14675	18396	10668	14917	4048	5226	5946	5713	4216	5399	7164	3355	3002	10521.7	9408.9	0.894238	7606.88	5145.86	0.591064
Metabolism	Xenobiotics Biodegradation and Metabolism	ko00633	Nitrotoluene degradation	24029	32520	22205	27850	28354	23941	25320	25073	14771	24149	14562	27262	21550	13966	23138	15908	20599	35900	36685	55476	15851	21888	41887	20852	37293	22910	20489	16192	27696	39429	24632	19065	19450	18722	19507	14370	16627	17395	14796	16204	25662.9	22262.8	0.867507	9514.06	8185.27	0.233155
Metabolism	Biosynthesis Of Other Secondary Metabolites	ko00311	Penicillin and cephalosporin biosynthesis	5368	4342	2054	2184	4321	1803	2458	3991	1738	3017	6841	5606	5050	7599	5162	5653	4431	4237	5181	2514	1942	2715	2666	3597	5358	1978	937	2960	1483	1711	1692	3266	5043	5948	3912	5819	5004	5890	4236	4473	4177.5	3531.5	0.845362	1693.13	1627.62	0.22622
Metabolism	Xenobiotics Biodegradation and Metabolism	ko00643	Styrene degradation	10295	7179	4989	8837	11978	10565	10971	7720	2609	8648	7877	7576	7269	5645	10819	6443	6999	19649	21363	32461	7986	6991	7086	10383	11720	6949	13040	7904	13617	13151	7138	7881	8788	7503	8533	6497	7528	5066	6843	7142	10494.6	8587.3	0.818259	6814.45	2451.05	0.246186
Metabolism	Metabolism Of Cofactors and Vitamins	ko00130	Ubiquinone and other terpenoid-quinone biosynthesis	45803	66778	29338	27497	56300	36316	30042	42965	31123	42406	54627	68468	47613	63303	38676	36752	35603	57380	43021	42667	25001	41724	20669	31572	38087	34270	27459	46908	32702	35302	26334	29017	37435	50160	32414	47692	41613	69894	33063	30091	44833.9	36570.3	0.815685	12566.7	11075.6	0.0334881
Metabolism	Metabolism Of Cofactors and Vitamins	ko00780	Biotin metabolism	35843	36672	40773	34019	51069	36509	31240	37141	29559	35814	22988	29645	22650	22189	24122	17196	18569	67130	67637	97986	30468	28906	34067	30381	51003	36285	37783	31549	35954	46246	32950	24072	21918	25945	26413	20715	22078	28152	21862	22752	37937.6	30475	0.803293	19780.8	8163.43	0.127148
Metabolism	Xenobiotics Biodegradation and Metabolism	ko00623	Toluene degradation	22057	32070	13079	16191	29708	17372	16464	22103	11406	20713	19638	36944	28064	31317	27558	23721	23049	35925	33070	36755	14012	20524	16266	15647	24050	11452	12817	19577	16200	22968	15442	15925	24810	26193	20267	27529	23776	31092	19154	18994	24860.2	19834.8	0.797852	7940.89	5269.66	0.0236111
Metabolism	Metabolism Of Terpenoids and Polyketides	ko00281	Geraniol degradation	16960	29347	10524	13278	22479	11696	10126	19535	11058	15981	17039	34838	24221	25792	20310	18573	18934	18494	9897	5535	9369	19190	8316	9995	12684	7170	4846	18232	7343	10512	8394	11121	19234	21118	13743	24027	19599	27920	15166	14416	17730.8	14119.8	0.796338	7235.42	6274.6	0.0999457
Metabolism	Xenobiotics Biodegradation and Metabolism	ko00930	Caprolactam degradation	15708	24017	8284	9811	21704	13487	9966	16360	8968	14265	14057	27001	18698	20862	16143	14353	14010	22253	16469	17441	9729	15535	6217	10287	13969	8212	10024	17786	8743	11634	9288	8579	14840	16748	11099	19048	15204	22818	11152	10969	16192.9	12594	0.777754	5094.41	4246.07	0.0200841
Metabolism	Lipid Metabolism	ko00592	alpha-Linolenic acid metabolism	4714	8505	3048	2757	6481	2950	2282	5438	3186	4262	4939	9378	6186	6952	4402	4388	4577	5069	2312	802	2780	5266	1742	2511	3627	1787	1238	5283	1717	2525	2426	2397	4223	5172	2923	6317	4869	7755	3799	3202	4631.4	3577.95	0.772542	2133.11	1733.18	0.0946562
Metabolism	Glycan Biosynthesis and Metabolism	ko00604	Glycosphingolipid biosynthesis - ganglio series	5828	5188	5720	3884	8038	7885	6023	4357	13278	6240	5550	2933	2469	3243	2869	2020	2009	10353	10306	14742	6115	5595	1818	6166	5849	4396	8578	6760	10476	7389	6076	2197	2212	2766	2605	2551	2836	3859	2065	1490	6146.75	4589.95	0.746728	3652.04	2542.58	0.125977
Metabolism	Metabolism Of Terpenoids and Polyketides	ko01053	Biosynthesis of siderophore group nonribosomal peptides	12859	19543	6060	8401	19705	12515	10354	13074	6259	11772	13960	19606	11769	13834	11953	9873	9209	27156	24560	33034	8305	11060	3752	9450	12588	6633	12634	14470	17109	16044	8188	7145	10003	12501	8049	12076	10384	17751	7856	7013	14774.8	10650.5	0.720859	7092.25	3744.77	0.0270499
Metabolism	Xenobiotics Biodegradation and Metabolism	ko00364	Fluorobenzoate degradation	1583	3416	782	1026	2282	972	737	1840	1126	1407	1848	3094	2076	1973	1433	1457	1451	1751	766	309	478	1672	586	738	1081	538	243	1702	479	634	548	762	1292	1567	738	2097	1656	2195	1080	1030	1566.45	1055.8	0.674008	771.63	580.313	0.0232214
Metabolism	Biosynthesis Of Other Secondary Metabolites	ko00232	Caffeine metabolism	1	0	0	1	0	0	0	0	0	1	0	0	0	5	0	0	0	0	0	1	0	0	0	0	0	0	0	0	0	1	0	0	0	3	0	0	1	0	0	0	0.45	0.25	0.555556	1.14593	0.71635	0.512064
Metabolism	Biosynthesis Of Other Secondary Metabolites	ko00945	Stilbenoid, diarylheptanoid and gingerol biosynthesis	125	43	95	496	888	68	56	183	290	220	220	25	56	123	67	7	91	58	29	103	77	62	193	148	90	108	224	92	82	64	119	14	8	96	22	92	90	171	10	25	162.15	89.35	0.551033	205.692	60.3204	0.137079
Metabolism	Lipid Metabolism	ko00100	Steroid biosynthesis	3	1	0	8	13	4	2	1	1	4	5	0	0	37	0	0	0	0	1	16	1	0	1	0	0	2	7	0	0	2	0	1	0	18	3	1	6	3	0	0	4.8	2.25	0.46875	8.79952	4.2162	0.249787
Metabolism	Metabolism Of Terpenoids and Polyketides	ko01057	Biosynthesis of type II polyketide products	0	0	0	0	0	0	0	0	0	0	0	0	0	2	0	0	0	0	0	2	0	0	0	0	0	0	0	0	0	0	0	0	0	0	0	0	1	0	0	0	0.2	0.05	0.25	0.615587	0.223607	0.312195
Metabolism	Metabolism Of Terpenoids and Polyketides	ko00522	Biosynthesis of 12-, 14- and 16-membered macrolides	0	0	0	0	0	0	0	0	0	0	0	0	0	2	0	0	0	0	0	2	0	0	0	0	0	0	0	0	0	0	0	0	0	0	0	0	1	0	0	0	0.2	0.05	0.25	0.615587	0.223607	0.312195
Metabolism	Glycan Biosynthesis and Metabolism	ko00513	Various types of N-glycan biosynthesis	0	0	0	0	0	0	0	0	0	0	0	0	0	1	0	0	0	0	0	0	0	0	0	0	0	0	0	0	0	0	0	0	0	0	0	0	0	0	0	0	0.05	0	0	0.223607	0	0.323636
